# Supplementary material for: Effect of structural variations in cations of ionic liquids on the coexistence curve of isobutyric acid and water
Source: Royal Society of Chemistry journal article supplement (doi:10.1039/c2nj40462a), 2012-01-01
Supplement: c2nj40462a.pdf [file c2nj40462a.pdf]

## Supplementary Informations

### Effect of Structural Variations in Cation of Ionic Liquids on the Coexistence Curve of Isobutyric Acid and Water

Awanish Kumar, P. Madhusudhana Reddy and Pannuru Venkatesu\*

*Department of Chemistry, University of Delhi, Delhi – 110 007, India*

For a sample of pure IBW, we prepared from 2.508 g of water and 1.5505 g of IB with a UCST of 26.924 °C using equal volume criterion. The cell containing the solution mixture was immersed in the isolated water bath where it could be seen through a window of the water bath. The temperature of the water bath was controlled up to third decimal place (for instance 25.003 °C with an accuracy of  $\pm 0.002$ ) using a Eurotherm temperature controller (Eurotherm 3500 Series) attached with a RTD probe.

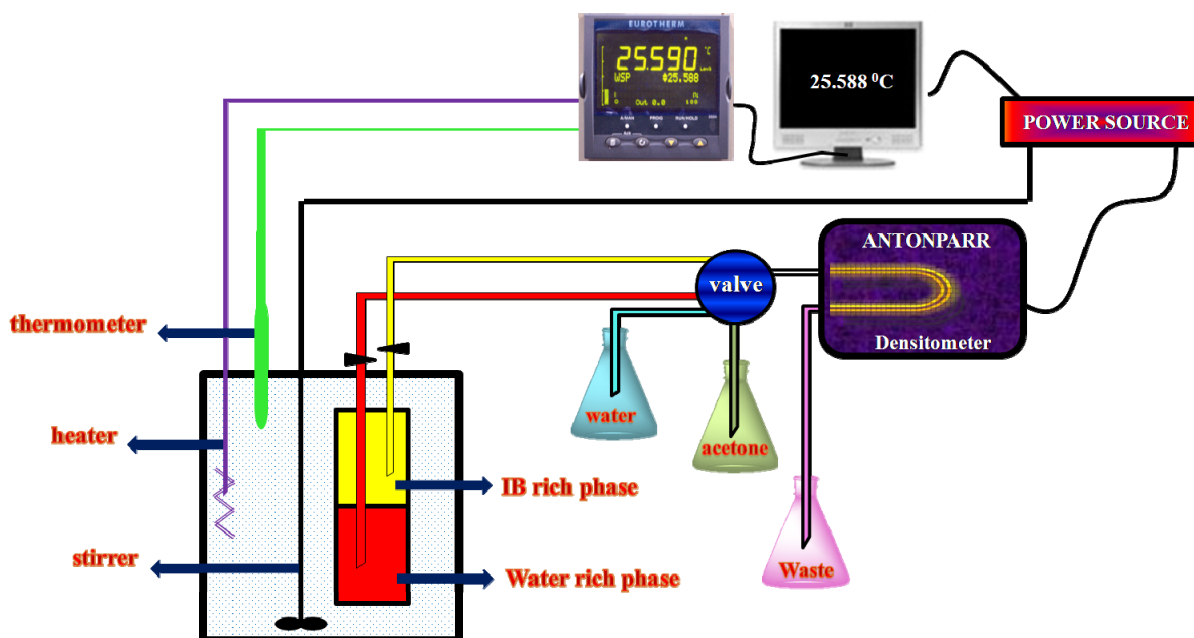

**Scheme IS.** Schematic representation of experimental set up to determine the critical coexisting curve using density measurements.

**Table IS.** Coexistence curve data for Isobutyric acid and water (IBW) with and without 1-Hexyl-3-Methyl Imidazolium Tetrafluoroborate (IL-1). The measured data are of the densities of IB ( $\rho_1$ ) and water rich phase ( $\rho_2$ ), respectively, as a function of temperature (T).

| <b>Pure</b>                                    |                                           |                                           |
|------------------------------------------------|-------------------------------------------|-------------------------------------------|
| $T_c=26.924\pm 0.002$ °C; 0 mg/ml of IL in IBW |                                           |                                           |
| <b>T(°C)</b>                                   | <b><math>\rho_1(\text{g/cm}^3)</math></b> | <b><math>\rho_2(\text{g/cm}^3)</math></b> |
| 22.171                                         | 0.98711                                   | 1.00198                                   |
| 22.836                                         | 0.98755                                   | 1.00135                                   |
| 23.344                                         | 0.98768                                   | 1.00119                                   |
| 23.990                                         | 0.98791                                   | 1.00085                                   |
| 24.566                                         | 0.98813                                   | 1.00052                                   |
| 25.088                                         | 0.98854                                   | 1.00000                                   |
| 25.525                                         | 0.98907                                   | 0.99975                                   |
| 26.085                                         | 0.99023                                   | 0.99899                                   |
| 26.313                                         | 0.99047                                   | 0.99863                                   |
| 26.501                                         | 0.99105                                   | 0.99809                                   |
| 26.623                                         | 0.99135                                   | 0.99786                                   |
| 26.731                                         | 0.99185                                   | 0.99742                                   |
| 26.823                                         | 0.99250                                   | 0.99671                                   |
| 26.903                                         | 0.99316                                   | 0.99583                                   |
| 26.910                                         | 0.99325                                   | 0.99564                                   |
| 26.915                                         | 0.99343                                   | 0.99542                                   |
| 26.918                                         | 0.99357                                   | 0.99524                                   |
| 26.920                                         | 0.99369                                   | 0.99509                                   |

  

| <b>SET 1</b>                                     |                                           |                                           |
|--------------------------------------------------|-------------------------------------------|-------------------------------------------|
| $T_c=26.371\pm 0.002$ °C; 0.5 mg/ml of IL in IBW |                                           |                                           |
| <b>T(°C)</b>                                     | <b><math>\rho_1(\text{g/cm}^3)</math></b> | <b><math>\rho_2(\text{g/cm}^3)</math></b> |
| 22.004                                           | 0.98799                                   | 0.01366                                   |
| 22.257                                           | 0.98816                                   | 0.01326                                   |
| 22.489                                           | 0.98831                                   | 0.01288                                   |
| 22.744                                           | 0.98855                                   | 0.01244                                   |
| 22.992                                           | 0.98874                                   | 0.01209                                   |
| 23.276                                           | 0.98895                                   | 0.01161                                   |
| 23.495                                           | 0.98906                                   | 0.01135                                   |
| 23.786                                           | 0.98929                                   | 0.01092                                   |
| 24.017                                           | 0.98943                                   | 0.01075                                   |
| 24.229                                           | 0.98969                                   | 0.01013                                   |
| 24.418                                           | 0.98990                                   | 0.00964                                   |
| 24.902                                           | 0.99037                                   | 0.00836                                   |
| 25.205                                           | 0.99076                                   | 0.00765                                   |
| 25.422                                           | 0.99102                                   | 0.00706                                   |
| 25.740                                           | 0.99161                                   | 0.00611                                   |

|        |         |         |
|--------|---------|---------|
| 25.859 | 0.99177 | 0.00570 |
| 26.006 | 0.99206 | 0.00521 |
| 26.064 | 0.99222 | 0.00470 |
| 26.193 | 0.99247 | 0.00402 |
| 26.263 | 0.99273 | 0.00351 |
| 26.310 | 0.99312 | 0.00281 |
| 26.326 | 0.99341 | 0.00227 |
| 26.340 | 0.99335 | 0.00221 |

---

**SET 2**

$T_c=26.192\pm 0.002$  °C; 1.0 mg/ml of IL in IBW

---

| $T(^{\circ}\text{C})$ | $\rho_1(\text{g}/\text{cm}^3)$ | $\rho_2(\text{g}/\text{cm}^3)$ |
|-----------------------|--------------------------------|--------------------------------|
| 22.016                | 0.98922                        | 1.00064                        |
| 22.488                | 0.98944                        | 1.00031                        |
| 23.001                | 0.98986                        | 0.99995                        |
| 23.494                | 0.99018                        | 0.99985                        |
| 23.987                | 0.99071                        | 0.99959                        |
| 24.499                | 0.99104                        | 0.99886                        |
| 24.993                | 0.99138                        | 0.99813                        |
| 25.486                | 0.99217                        | 0.99774                        |
| 25.638                | 0.99219                        | 0.99751                        |
| 25.704                | 0.99249                        | 0.99732                        |
| 25.793                | 0.99270                        | 0.99722                        |
| 25.837                | 0.99296                        | 0.99688                        |
| 25.970                | 0.99326                        | 0.99660                        |
| 26.014                | 0.99361                        | 0.99633                        |
| 26.089                | 0.99390                        | 0.99598                        |
| 26.170                | 0.99410                        | 0.99567                        |
| 26.236                | 0.99429                        | 0.99543                        |

---

**SET 3**

$T_c=24.309\pm 0.002$  °C; 1.5 mg/ml of IL in IBW

---

| $T(^{\circ}\text{C})$ | $\rho_1(\text{g}/\text{cm}^3)$ | $\rho_2(\text{g}/\text{cm}^3)$ |
|-----------------------|--------------------------------|--------------------------------|
| 21.993                | 0.99027                        | 1.00041                        |
| 22.443                | 0.99051                        | 0.99996                        |
| 22.827                | 0.99078                        | 0.99950                        |
| 23.253                | 0.99159                        | 0.99879                        |
| 23.487                | 0.99201                        | 0.99835                        |
| 23.764                | 0.99257                        | 0.99759                        |
| 23.957                | 0.99308                        | 0.99698                        |
| 24.062                | 0.99333                        | 0.99678                        |
| 24.148                | 0.99348                        | 0.99647                        |
| 24.191                | 0.99369                        | 0.99657                        |
| 24.269                | 0.99402                        | 0.99617                        |
| 24.309                | 0.99422                        | 0.99590                        |
| 24.315                | 0.99426                        | 0.99582                        |

---

---

**SET 4**

$T_c=24.026\pm 0.002$  °C; 2.0 mg/ml of IL in IBW

---

| <b>T(°C)</b> | <b><math>\rho_1(\text{g/cm}^3)</math></b> | <b><math>\rho_2(\text{g/cm}^3)</math></b> |
|--------------|-------------------------------------------|-------------------------------------------|
| 22.226       | 0.99130                                   | 0.99979                                   |
| 22.554       | 0.99161                                   | 0.99941                                   |
| 22.877       | 0.99190                                   | 0.99875                                   |
| 23.002       | 0.99209                                   | 0.99842                                   |
| 23.292       | 0.99251                                   | 0.99797                                   |
| 23.452       | 0.99280                                   | 0.99718                                   |
| 23.708       | 0.99324                                   | 0.99647                                   |
| 23.815       | 0.99354                                   | 0.99620                                   |
| 23.890       | 0.99378                                   | 0.99593                                   |
| 23.942       | 0.99395                                   | 0.99588                                   |
| 23.985       | 0.99411                                   | 0.99540                                   |
| 24.017       | 0.99423                                   | 0.99533                                   |
| 24.049       | 0.99427                                   | 0.99523                                   |

**Table II.** Coexistence curve data for Isobutyric acid and water (IBW) with 1-Benzyl- 3-Methyl Imidazolium Tetrafluoroborate (IL-2). The measured data are of the densities of IB ( $\rho_1$ ) and water rich phase ( $\rho_2$ ), respectively, as a function of temperature (T).

| <b>SET 1</b>                                     |                                           |                                           |
|--------------------------------------------------|-------------------------------------------|-------------------------------------------|
| $T_c=27.424\pm 0.002$ °C; 0.5 mg/ml of IL in IBW |                                           |                                           |
| <b>T(°C)</b>                                     | <b><math>\rho_1(\text{g/cm}^3)</math></b> | <b><math>\rho_2(\text{g/cm}^3)</math></b> |
| 22.000                                           | 0.98666                                   | 1.00257                                   |
| 22.500                                           | 0.98697                                   | 1.00226                                   |
| 23.000                                           | 0.98709                                   | 1.00193                                   |
| 23.500                                           | 0.98725                                   | 1.00172                                   |
| 24.000                                           | 0.98744                                   | 1.00141                                   |
| 24.500                                           | 0.98772                                   | 1.00099                                   |
| 25.000                                           | 0.98794                                   | 1.00049                                   |
| 25.500                                           | 0.98829                                   | 1.00018                                   |
| 26.000                                           | 0.98894                                   | 0.99952                                   |
| 26.500                                           | 0.99016                                   | 0.99894                                   |
| 27.004                                           | 0.99160                                   | 0.99801                                   |
| 27.174                                           | 0.99210                                   | 0.99729                                   |
| 27.285                                           | 0.99252                                   | 0.99672                                   |
| 27.352                                           | 0.99276                                   | 0.99604                                   |
| 27.369                                           | 0.99303                                   | 0.99573                                   |
| 27.388                                           | 0.99329                                   | 0.99542                                   |
| 27.416                                           | 0.99352                                   | 0.99511                                   |
| 27.430                                           | 0.99362                                   | 0.99500                                   |
| 27.461                                           | 0.99373                                   | 0.99489                                   |
| 27.502                                           | 0.99379                                   | 0.99478                                   |

  

| <b>SET 2</b>                                     |                                           |                                           |
|--------------------------------------------------|-------------------------------------------|-------------------------------------------|
| $T_c=27.549\pm 0.002$ °C; 1.0 mg/ml of IL in IBW |                                           |                                           |
| <b>T(°C)</b>                                     | <b><math>\rho_1(\text{g/cm}^3)</math></b> | <b><math>\rho_2(\text{g/cm}^3)</math></b> |
| 21.964                                           | 0.98627                                   | 1.0031                                    |
| 22.541                                           | 0.98654                                   | 1.00273                                   |
| 23.062                                           | 0.98678                                   | 1.00244                                   |
| 23.502                                           | 0.98682                                   | 1.00215                                   |
| 23.942                                           | 0.98713                                   | 1.00170                                   |
| 24.573                                           | 0.98729                                   | 1.00120                                   |
| 25.124                                           | 0.98764                                   | 1.00079                                   |
| 25.674                                           | 0.98799                                   | 1.00038                                   |
| 26.084                                           | 0.98866                                   | 0.99980                                   |
| 26.497                                           | 0.98967                                   | 0.99926                                   |
| 26.789                                           | 0.99022                                   | 0.99893                                   |
| 27.002                                           | 0.99081                                   | 0.99844                                   |
| 27.214                                           | 0.99140                                   | 0.99799                                   |

|        |         |         |
|--------|---------|---------|
| 27.324 | 0.99195 | 0.99737 |
| 27.401 | 0.99218 | 0.99683 |
| 27.427 | 0.99230 | 0.99638 |
| 27.481 | 0.99265 | 0.99572 |
| 27.507 | 0.99281 | 0.99519 |

### SET 3

$T_c=28.458\pm 0.002$  °C; 1.5 mg/ml of IL in IBW

| $T(^{\circ}\text{C})$ | $\rho_1(\text{g}/\text{cm}^3)$ | $\rho_2(\text{g}/\text{cm}^3)$ |
|-----------------------|--------------------------------|--------------------------------|
| 22.172                | 0.98583                        | 1.00379                        |
| 22.782                | 0.98606                        | 1.00333                        |
| 23.075                | 0.98601                        | 1.00306                        |
| 23.586                | 0.98628                        | 1.00270                        |
| 24.098                | 0.98651                        | 1.00233                        |
| 25.002                | 0.98692                        | 1.00188                        |
| 25.407                | 0.98728                        | 1.00147                        |
| 25.689                | 0.98760                        | 1.00120                        |
| 26.271                | 0.98806                        | 1.00056                        |
| 26.505                | 0.98850                        | 1.00020                        |
| 26.853                | 0.98896                        | 0.99975                        |
| 27.192                | 0.98959                        | 0.99909                        |
| 27.515                | 0.99046                        | 0.99843                        |
| 27.810                | 0.99118                        | 0.99757                        |
| 28.072                | 0.99200                        | 0.99683                        |
| 28.202                | 0.99248                        | 0.99632                        |
| 28.260                | 0.99294                        | 0.99629                        |
| 28.298                | 0.99264                        | 0.99609                        |
| 28.326                | 0.99286                        | 0.99558                        |
| 28.381                | 0.99303                        | 0.99564                        |
| 28.409                | 0.99314                        | 0.99541                        |
| 28.520                | 0.99331                        | 0.99530                        |

### SET 4

$T_c=28.591\pm 0.002$  °C; 2.0 mg/ml of IL in IBW

| $T(^{\circ}\text{C})$ | $\rho_1(\text{g}/\text{cm}^3)$ | $\rho_2(\text{g}/\text{cm}^3)$ |
|-----------------------|--------------------------------|--------------------------------|
| 22.000                | 0.98510                        | 1.00435                        |
| 22.502                | 0.98520                        | 1.00416                        |
| 23.500                | 0.98560                        | 1.00340                        |
| 24.011                | 0.98588                        | 1.00326                        |
| 24.500                | 0.98615                        | 1.00264                        |
| 24.982                | 0.98651                        | 1.00226                        |
| 25.469                | 0.98692                        | 1.00179                        |
| 26.010                | 0.98756                        | 1.00112                        |
| 26.499                | 0.98832                        | 1.00051                        |
| 27.010                | 0.98891                        | 0.99970                        |

|        |         |         |
|--------|---------|---------|
| 27.483 | 0.98982 | 0.99885 |
| 27.985 | 0.99072 | 0.99781 |
| 28.201 | 0.99157 | 0.99702 |
| 28.258 | 0.99186 | 0.99668 |
| 28.292 | 0.99201 | 0.99647 |
| 28.351 | 0.99225 | 0.99625 |
| 28.390 | 0.99252 | 0.99617 |
| 28.420 | 0.99261 | 0.99593 |
| 28.515 | 0.99286 | 0.99587 |
